# Supplementary material for: Protein kinase A activation by the anti-cancer drugs ABT-737 and thymoquinone is caspase-3-dependent and correlates with platelet inhibition and apoptosis
Source: PubMed Central journal article supplement (PMC5520940; doi:10.1038/cddis.2017.290), 2017-06-29
Supplement: cddis2017290x1.pdf [file cddis2017290x1.pdf]

## Supplementary Figure

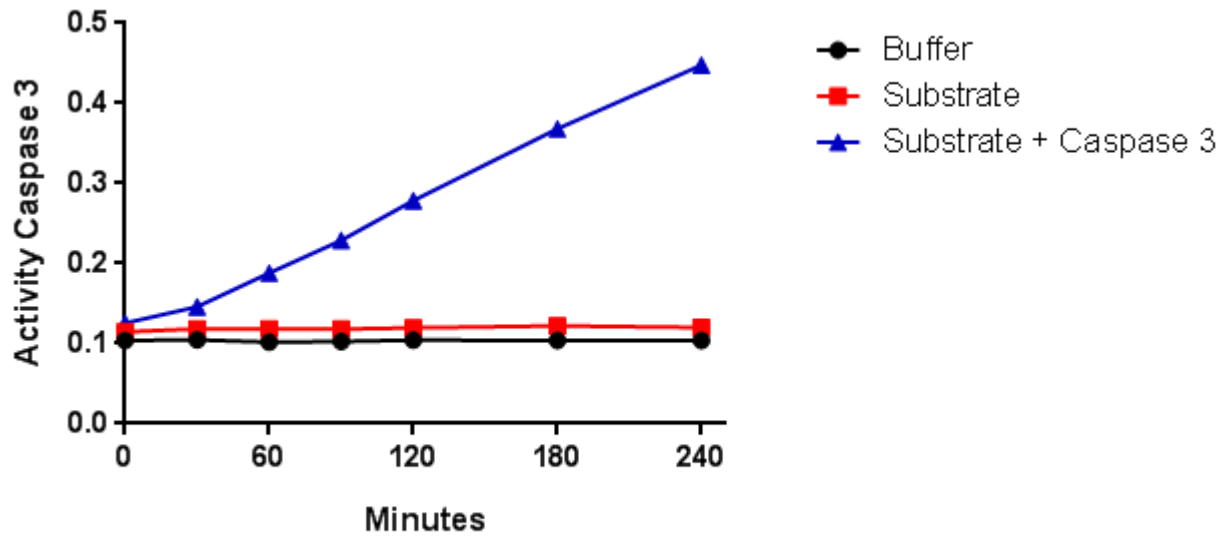

### Supplementary Figure 1. Colorimetric analysis of caspase-3 activity

Activity of caspase 3 was measured colorimetrically at 405 nm by degradation of the specific substrate (Ac-DEVD-pNA) on indicated times. Presented data are representative of 3 independent experiments.
